# Supplementary material
Source: PubMed Central journal article supplement (PMC7456215)

**Supplemental Table 1. Oligonucleotide sequence of RT-qPCR primers.**

| <b>Gene</b>               | <b>sequence (5' to 3')</b>        |
|---------------------------|-----------------------------------|
| <i>S100A10</i>            | Forward: GGCTACTTAACAAAGGAGGACC   |
|                           | Reverse: GAGGCCCGCAATTAGGGAAA     |
| <i>S100a10</i><br>(mouse) | Forward: TGGAAACCATGATGCTTACGTT   |
|                           | Reverse: GAAGCCCACTTTGCCATCTC     |
| <i>NANOG</i>              | Forward: TTTGTGGGCCTGAAGAAAAC     |
|                           | Reverse: AGGGCTGTCCTGAATAAGCAG    |
| <i>SOX2</i>               | Forward: GCCGAGTGGAACTTTTGTCTG    |
|                           | Reverse: GGCAGCGTGTACTTATCCTTCT   |
| <i>KLF4</i>               | Forward: CGGACATCAACGACGTGAG      |
|                           | Reverse: GACGCCTTCAGCACGAACT      |
| <i>POU5F1</i>             | Forward: TTCAGCCAAACGACCATCTG     |
|                           | Reverse: CACGAGGGTTTCTGCTTTGC     |
| <i>ANXA2</i>              | Forward: TCTACTGTTACGAAATCCTGTG   |
|                           | Reverse: AGTATAGGCTTTGACAGACCCAT  |
| <i>SUPT6H</i>             | Forward: GGATGAGCAAGGCAACTTGAA    |
|                           | Reverse: CACGCCGGTACTTTTGTCTCT    |
| <i>KDM6A</i>              | Forward: TTCCTCGGAAGGTGCTATTCA    |
|                           | Reverse: GAGGCTGGTTGCAGGATTCA     |
| <i>18S</i>                | Forward: CGGCGACGACCCATTGGAAC     |
|                           | Reverse: GAATCGAACCCCTGATTCCCCGTC |

**Supplemental Table 2. Primary antibody information for immunoblot assays.**

| <b>Antibody</b>   | <b>Manufacture</b> | <b>Catalog #</b> |
|-------------------|--------------------|------------------|
| HIF-1 $\alpha$    | BD Biosciences     | 610959           |
| <i>S100A10</i>    | Novus Biologicals  | AF2377           |
| <i>ANXA2</i>      | Novus Biologicals  | NBP1-31310       |
| <i>SPT6</i>       | Novus Biologicals  | NB100-2582       |
| <i>KDM6A</i>      | Novus Biologicals  | NBP1-80628       |
| <i>KDM6B</i>      | Novus Biologicals  | NBP1-06640       |
| <i>NANOG</i>      | Novus Biologicals  | AF1997           |
| <i>SOX2</i>       | Novus Biologicals  | NB110-37235      |
| <i>OCT4</i>       | Novus Biologicals  | NB100-2379       |
| <i>KLF4</i>       | Novus Biologicals  | NBP1-83940       |
| $\alpha$ -TUBULIN | Novus Biologicals  | NB100-690        |
| H3K27me3          | Novus Biologicals  | NBP2-59206       |
| HISTONE H3        | Novus Biologicals  | NB500-171        |
| ACTIN             | Santa Cruz         | SC-47778         |

**Supplemental Table 3. Antibody information for co-immunoprecipitation assays.**

| <b>Antibody</b> | <b>Manufacturer</b> | <b>Catalog #</b> |
|-----------------|---------------------|------------------|
| S100A10         | Novus Biologicals   | NBP1-89370       |
| ANXA2           | Novus Biologicals   | NBP1-31310       |
| SPT6            | Novus Biologicals   | NB100-2582       |
| KDM6A           | Novus Biologicals   | NBP1-80628       |

**Supplemental Table 4. shRNA information.**

| <b>shRNA</b> | <b>Nucleotide sequence (5' to 3')</b>                       |
|--------------|-------------------------------------------------------------|
| S100A10 #1   | CCGGCCATGATGTTTACATTTACACTCGAGTGTGAAATGTAAACATCATGGTTTTTG   |
| S100A10 #2   | CCGGTGAGCAGATCAGGACACTTAGCTCGAGCTAAGTGTCTGATCTGCTCATTTTTTG  |
| ANXA2 #1     | CCGGTGAGGGTGACGTTAGCATTACCTCGAGGTAATGCTAACGTCACCCTCATTTTTTG |
| ANXA2 #2     | CCGGGCAGGAAATTAACAGAGTCTACTCGAGTAGACTCTGTTAATTTCTGCTTTTTG   |
| SPT6 #1      | CCGGCCCTTGAAGAAATCTTGAAACTCGAGTTTCCAAGATTTCTTCAAGGGTTTTTG   |
| SPT6 #2      | CCGGCCAACCGTGAATGGACTGTTTCTCGAGAAACAGTCCATTCACGGTTGGTTTTTG  |
| KDM6A #1     | CCGGTGAATCTACATCGTCAGATAACTCGAGTTATCTGACGATGTAGATTCATTTTTG  |
| KDM6A #2     | CCGGTGAACAGCTCCGCGCAAATACTCGAGTATTTGCGCGGAGCTGTTCCATTTTTG   |

**Supplemental Table 5. Antibody information for chromatin immunoprecipitation assays.**

| <b>Antibody</b> | <b>Manufacturer</b> | <b>Catalog number</b> |
|-----------------|---------------------|-----------------------|
| HIF-1 $\alpha$  | Novus Biologicals   | NB100-479             |
| HIF-2 $\alpha$  | Novus Biologicals   | NB100-122             |
| HIF-1 $\beta$   | Novus Biologicals   | NB100-110             |
| OCT4            | Novus Biologicals   | AF1759                |
| S100A10         | Novus Biologicals   | H00006281-M09         |
| SPT6            | Novus Biologicals   | NB100-2582            |
| H3K27me3        | Novus Biologicals   | NBP2-59206            |
| Histone H3      | Novus Biologicals   | NB500-171             |
| KDM6A           | Novus Biologicals   | NBP1-80628            |

**Supplemental Table 6. Nucleotide sequence of ChIP-qPCR primers.**

|                                   |                                      |
|-----------------------------------|--------------------------------------|
| <i>S100A10</i> HIF-1 binding site | Forward: CGGACCTCCTAGGGCTAATC        |
|                                   | Reverse: TCCTCTCGGGTTTGGTTTTA        |
| <i>NANOG</i> OCT4 binding site    | Forward: GTTGGAACGTGGTGAACCT         |
|                                   | Reverse: CCTACTGACCCACCCTTGTG        |
| <i>SOX2</i> OCT4 binding site     | Forward: TCATCAATGAGAATTAGATGAGAGAGA |
|                                   | Reverse: GATAACAATTGCTGTTTCAGTCCA    |
| <i>KLF4</i> OCT4 binding site     | Forward: GGGCTTCCCCCTTTAAGAAG        |
|                                   | Reverse: AGTGCCAATGTGGAGGAAAA        |
| <i>POU5F1</i> OCT4 binding site   | Forward: TCGATCTCAGCTCACTGCAC        |
|                                   | Reverse: CTGGCCAACATGGTGAAC          |

## Supplemental Figure Legends

**Supplemental Figure 1. Changes in S100 family mRNA expression in paclitaxel-treated breast cancer cell lines.** mRNA expression of twenty S100 family members was accessed from Gene Expression Omnibus (GEO) dataset GSE50811, which contains transcriptome profiles of 27 breast cancer cell lines treated with vehicle or paclitaxel. Log<sub>2</sub> fold change (FC) of S100 mRNAs (paclitaxel vs. vehicle) in each cell line is presented as a heat map.

**Supplemental Figure 2. Chemotherapy induces HIF-1-dependent S100A10 expression. (A)**

Levels of S100A10 mRNA and 10 mRNAs encoded by HIF-target genes are shown for primary breast cancer samples accessed from TCGA database, which were classified based on the expression of a 50-mRNA signature (PAM50) that defines four molecular subtypes (Basal, HER2-enriched, Luminal B, and Luminal A). Color code: blue, less than the median; red, greater than the median. **(B)** MCF7 subclones were treated with vehicle (V), 10 nM paclitaxel (P), or 250 μM carboplatin (C) for 72 hours and immunoblot assays were performed. **(C)** MCF7 cells were treated with V, P, or C, either alone or in combination with 100 nM digoxin (D) for 72 hours and RT-qPCR was performed to quantify S100A10 mRNA (mean ± SEM; n = 3); \**p* < 0.05 vs. V; ##*p* < 0.01, ###*p* < 0.001 vs. P or C (one-way ANOVA with Bonferroni post-test). **(D and E)** MCF7 cells were treated with V or P for 72 hours **(D)**, or exposed to 20% or 1% O<sub>2</sub> for 16 hours **(E)**, and chromatin immunoprecipitation (ChIP) assays were performed. Primers flanking the HIF binding site in the *S100A10* gene were used for qPCR (mean ± SEM; n = 3); \*\*\**p* < 0.001 vs. corresponding V or 20%; ns, not significant (two-way ANOVA with Bonferroni post-test).

**Supplemental Figure 3. S100A10 knockdown blocked chemotherapy-induced BCSC enrichment. (A and B)** MCF7 cells were cultured on standard polystyrene tissue culture plates (Adherent) or ultra-low adherence plates (Sphere) for 6 days and harvested for analysis of S100A10 mRNA **(A)** and protein **(B)** expression. Results were normalized to Adherent (mean ±

SEM;  $n = 3$ );  $***p < 0.001$  (Student's  $t$  test). **(C - E)** MCF7 subclones stably transfected with vector encoding non-targeting control shRNA (NTC) or either of two different shRNAs targeting S100A10 (#1 and #2) were treated with vehicle (V) or 10 nM paclitaxel (P) for 72 hours. The percentage of ALDH<sup>+</sup> cells **(C)**; mean  $\pm$  SEM;  $n = 3$ ) and the number of mammospheres formed per 1,000 cells seeded **(D)**; mean  $\pm$  SEM;  $n = 4$ ) were determined.  $**p < 0.01$ ,  $***p < 0.001$  vs. NTC-V;  $###p < 0.001$  vs. NTC-P (two-way ANOVA with Bonferroni post-test). Representative photomicrograph of mammospheres is shown **(E)**; scale bars, 100  $\mu$ m). **(F)** MDA-MB-231 subclones stably transfected with vector encoding non-targeting control shRNA (NTC) or either of two different shRNAs targeting S100A10 (#1 and #2) were treated with vehicle (V) or 10 nM paclitaxel (P) for 72 hours. Representative photomicrograph of mammospheres formed per 1,000 cells seeded is shown (scale bars, 100  $\mu$ m). **(G)** MCF7 subclones transfected with NTC or S100A10 shRNA vector were treated with V or P, and RT-qPCR was performed (mean  $\pm$  SEM;  $n = 3$ ).  $**p < 0.01$ ,  $***p < 0.001$  vs. NTC-V;  $\#p < 0.05$ ,  $\##p < 0.01$ ,  $###p < 0.001$  vs. NTC-P (two-way ANOVA with Bonferroni post-test).

**Supplemental Figure S4. S100A10 regulates paclitaxel sensitivity in vitro, and regulates paclitaxel-induced pluripotency factor expression and BCSC enrichment in vivo.** **(A)** MDA-MB-231 subclones transfected with NTC or S100A10 shRNA vector were treated with vehicle (V) or 10 nM paclitaxel (P) for 72 hours and the numbers of live cells were counted (mean  $\pm$  SEM;  $n = 6$ ).  $***p < 0.001$  vs. NTC-V;  $###p < 0.001$  vs. NTC-P (two-way ANOVA with Bonferroni post-test). **(B)** Representative photomicrographs of mammospheres that were quantified in Figure 4C. **(C)** Densitometric analysis of immunoblots presented in Figure 4D.

**Supplemental Figure 5. ANXA2 knockdown blocked chemotherapy-induced BCSC enrichment.** **(A and B)** MCF7 cells were transfected with vector encoding NTC or either of two different shRNAs targeting ANXA2 (#1 and #2), and RT-qPCR **(A)**; mean  $\pm$  SEM,  $n = 3$ ;  $**p < 0.01$  vs. NTC; one-way ANOVA with Bonferroni post-test) and immunoblot **(B)** assays were

performed to analyze ANXA2 expression. **(C and D)** MCF7 subclones transfected with NTC or ANXA2 shRNA vector were treated with vehicle (V) or 10 nM paclitaxel (P) for 72 hours. The percentage of ALDH<sup>+</sup> cells was determined **(C)**, and RT-qPCR was performed in **(D)**; mean  $\pm$  SEM; n = 3). \*\*\* $p < 0.001$  vs. NTC-V; ## $p < 0.01$ , ### $p < 0.001$  vs. NTC-P (two-way ANOVA with Bonferroni post-test).

**Supplemental Figure 6. SPT6 interacts with the S100A10-ANXA2 complex and regulates**

**expression of pluripotency factors. (A)** MCF7 cells were treated with vehicle (V) or 10 nM paclitaxel (P) for 72 hours. Cytosolic and nuclear lysates were prepared, and immunoblot assays were performed. **(B - D)** MCF7 cells were transfected with vector encoding NTC or either of two different shRNAs targeting SPT6 (#1 and #2), and RT-qPCR **(B)**; mean  $\pm$  SEM, n = 3; \*\*\* $p < 0.001$  vs. NTC; one-way ANOVA with Bonferroni post-test), immunoblot **(C)**, and cell proliferation **(D)**; mean  $\pm$  SEM, n = 6; ns, not significant; one-way ANOVA) assays were performed. **(E)** MCF7 subclones transfected with NTC or SPT6 shRNA vector were treated with V or P for 72 hours, and RT-qPCR was performed (mean  $\pm$  SEM; n = 3). \* $p < 0.05$ , \*\* $p < 0.01$ , \*\*\* $p < 0.001$  vs. NTC-V; # $p < 0.05$ , ## $p < 0.01$ , ### $p < 0.001$  vs. NTC-P (two-way ANOVA with Bonferroni post-test).

**Supplemental Figure 7. KDM6A knockdown blocked chemotherapy-induced BCSC**

**enrichment. (A - C)** MCF7 cells were transfected with vector encoding NTC or either of two different shRNAs targeting KDM6A (#1 and #2), and RT-qPCR **(A)**; mean  $\pm$  SEM, n = 3, \*\*\* $p < 0.001$  vs. NTC; one-way ANOVA with Bonferroni post-test), immunoblot **(B)**, and cell proliferation **(C)**; mean  $\pm$  SEM, n = 6; ns, not significant; one-way ANOVA) assays were performed. **(D and E)** MCF7 subclones transfected with NTC or KDM6A shRNA vector were treated with vehicle (V) or 10 nM paclitaxel (P) for 72 hours. The percentage of ALDH<sup>+</sup> cells was determined **(D)** and RT-qPCR was performed **(E)** (mean  $\pm$  SEM; n = 3). \* $p < 0.05$ , \*\* $p < 0.01$ ,

\*\*\* $p < 0.001$  vs. NTC-V; ## $p < 0.01$ , ### $p < 0.001$  vs. NTC-P (two-way ANOVA with Bonferroni post-test).

**Supplemental Figure 8. Pharmacological inhibition of EZH2 fails to block paclitaxel-induced pluripotency factor expression and BCSC enrichment. (A, C, and D)** MDA-MB-231 cells were treated with vehicle (V) or 10 nM paclitaxel (P), in combination with 0  $\mu$ M, 0.2  $\mu$ M, or 1  $\mu$ M EZH2 inhibitor EPZ-6438, for 72 hours. Immunoblot (A) and RT-qPCR (C) assays were performed, and the percentage of ALDH<sup>+</sup> cells was determined (D) (mean  $\pm$  SEM;  $n = 3$ ). \*\*\* $P < 0.001$  vs. V and EPZ-6438 0  $\mu$ M; ns, not significant (two-way ANOVA with Bonferroni post-test). (B) MDA-MB-231 cells were treated with V or P, in combination with 0  $\mu$ M or 1  $\mu$ M EPZ-6438, for 72 hours, and ChIP assays were performed using antibody against H3K27me3 or total histone H3. Primers flanking OCT4 binding sites in the *NANOG*, *SOX2*, *KLF4*, and *POU5F1* genes were used for qPCR (mean  $\pm$  SEM;  $n = 3$ ). \*\* $P < 0.01$  vs. V and EPZ-6438 0  $\mu$ M (two-way ANOVA with Bonferroni post-test).

**Supplemental Figure 9. GSK-J4 increases global H3K27me3 modification in vivo. (A and B)**  $2 \times 10^6$  MDA-MB-231 cells were implanted into the MFP of female SCID mice. When tumor volume reached 200 mm<sup>3</sup> (day 0), mice were grouped randomly and treated with vehicle (V), paclitaxel (P; 10 mg/kg, days 0, 5, and 10), GSK-J4 (10 mg/kg, days 0-13), or the combination of P and GSK-J4. Tumors were harvested on day 13 for immunoblot assay to detect global H3K27me3 levels (A). Densitometric analysis was performed (B; mean  $\pm$  SEM;  $n = 4$ ). \*\* $p < 0.01$  vs. vehicle; # $p < 0.05$  vs. paclitaxel (one-way ANOVA with Bonferroni post-test).

Supplemental  
Figure 1

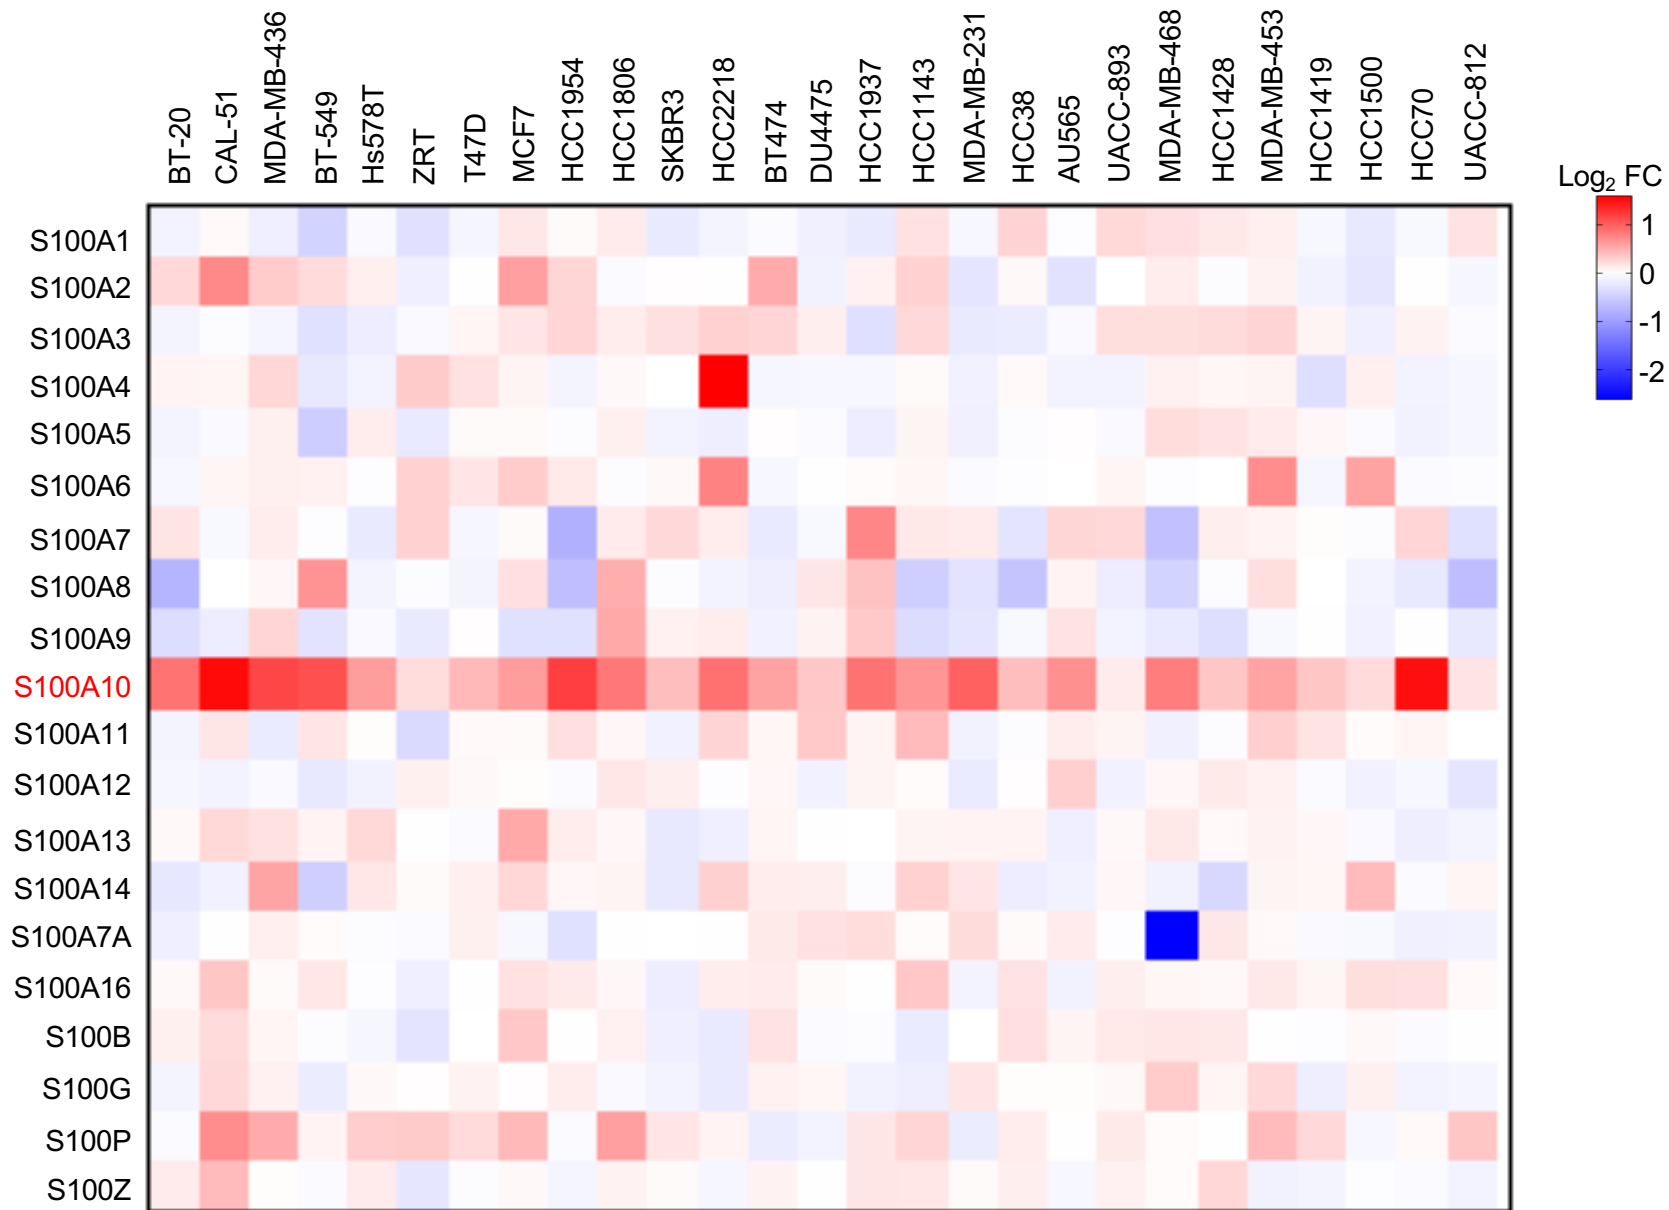



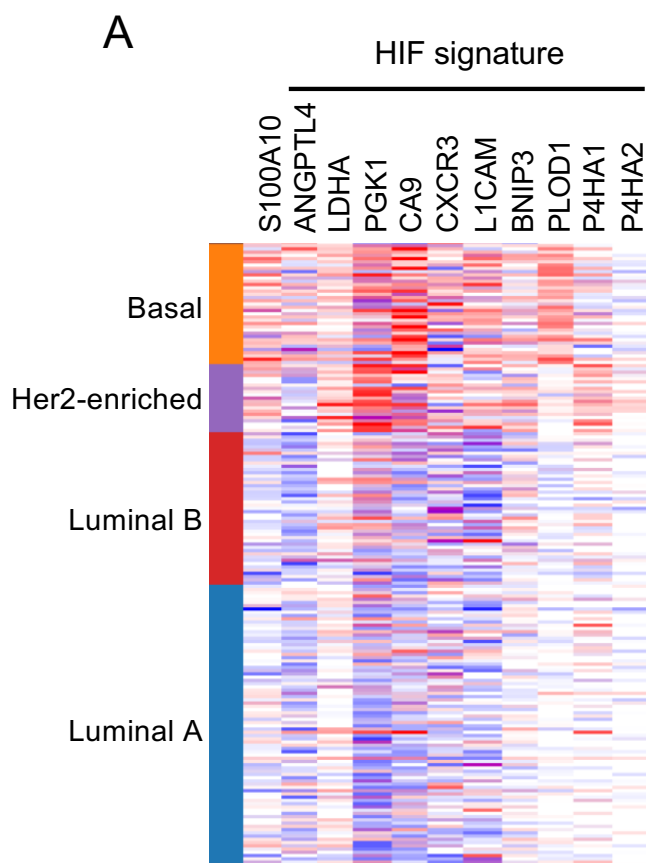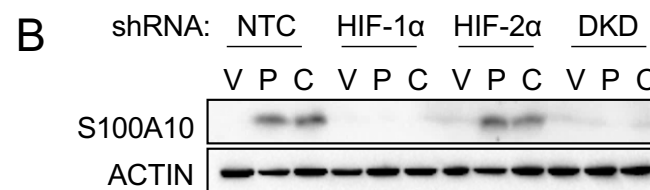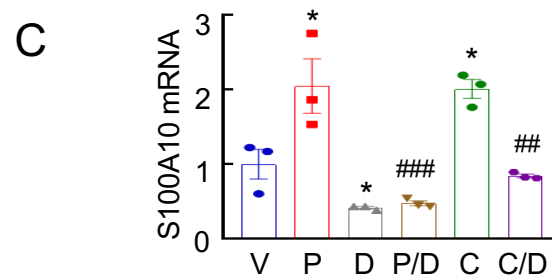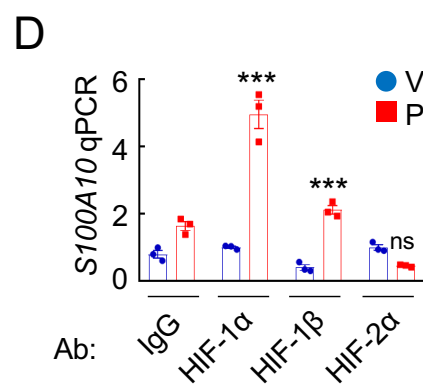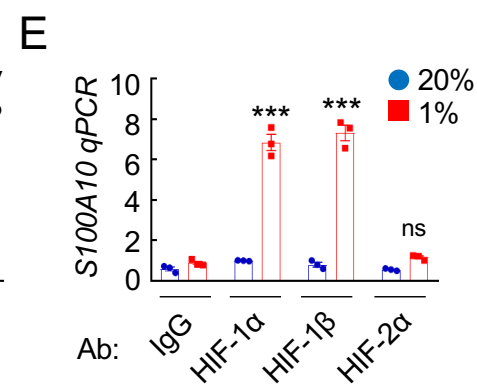

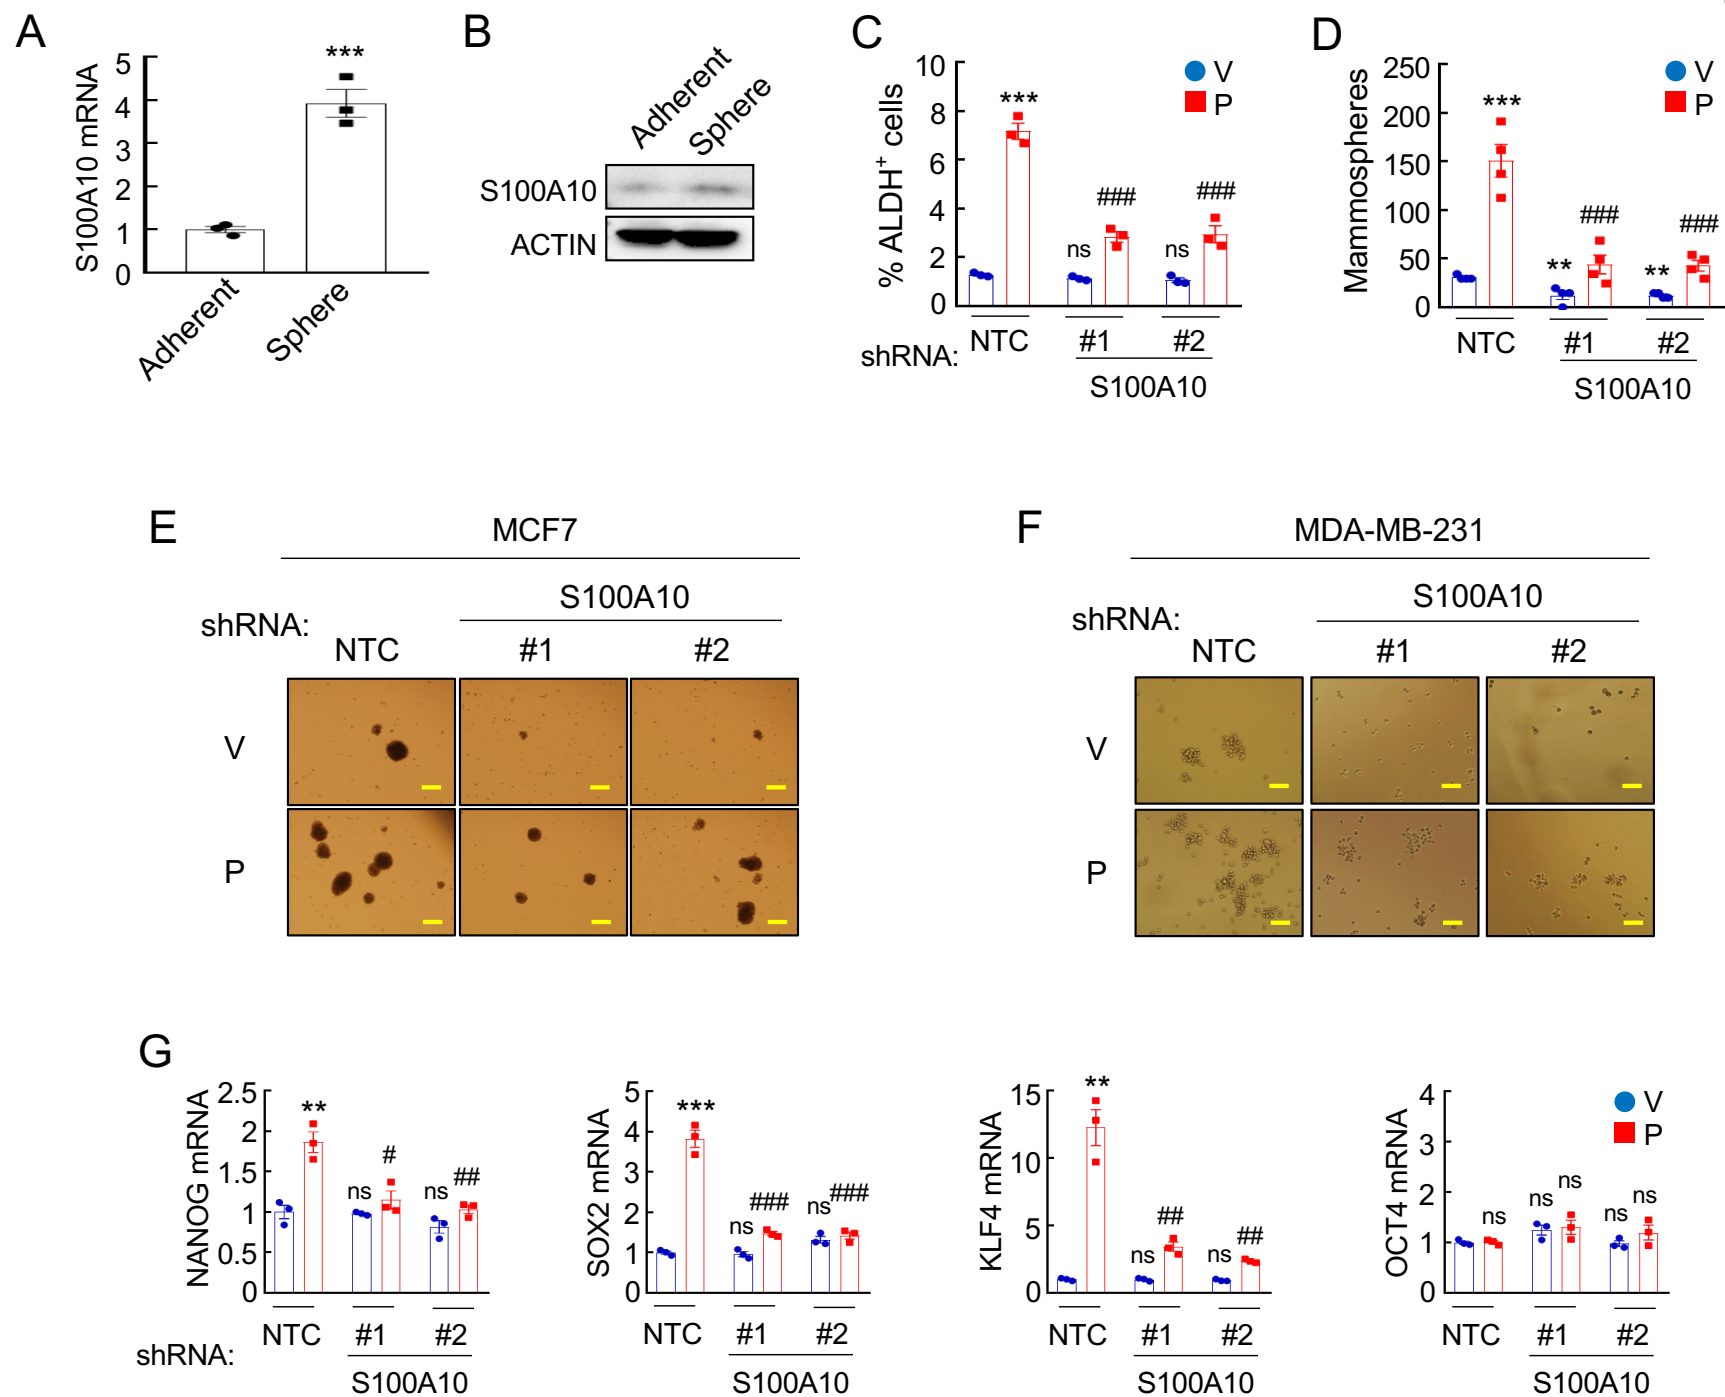

A

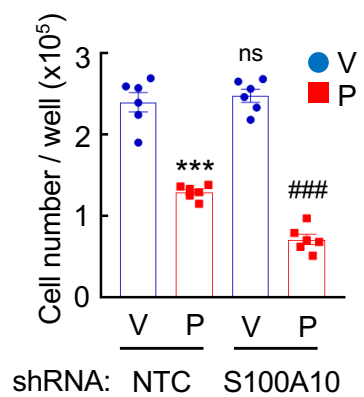

B

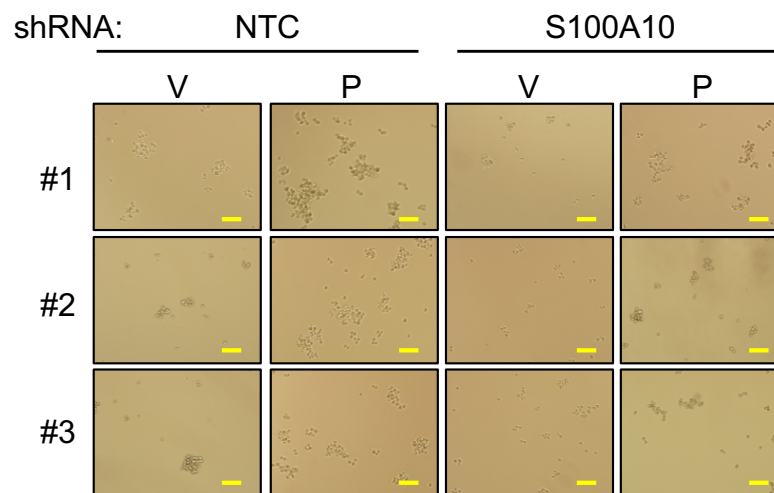

C

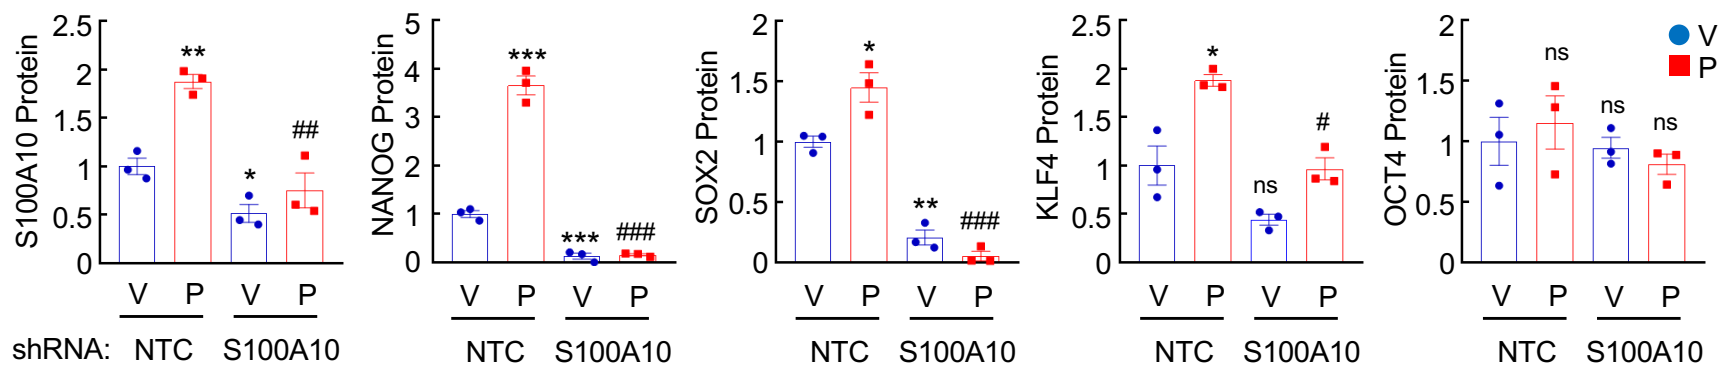

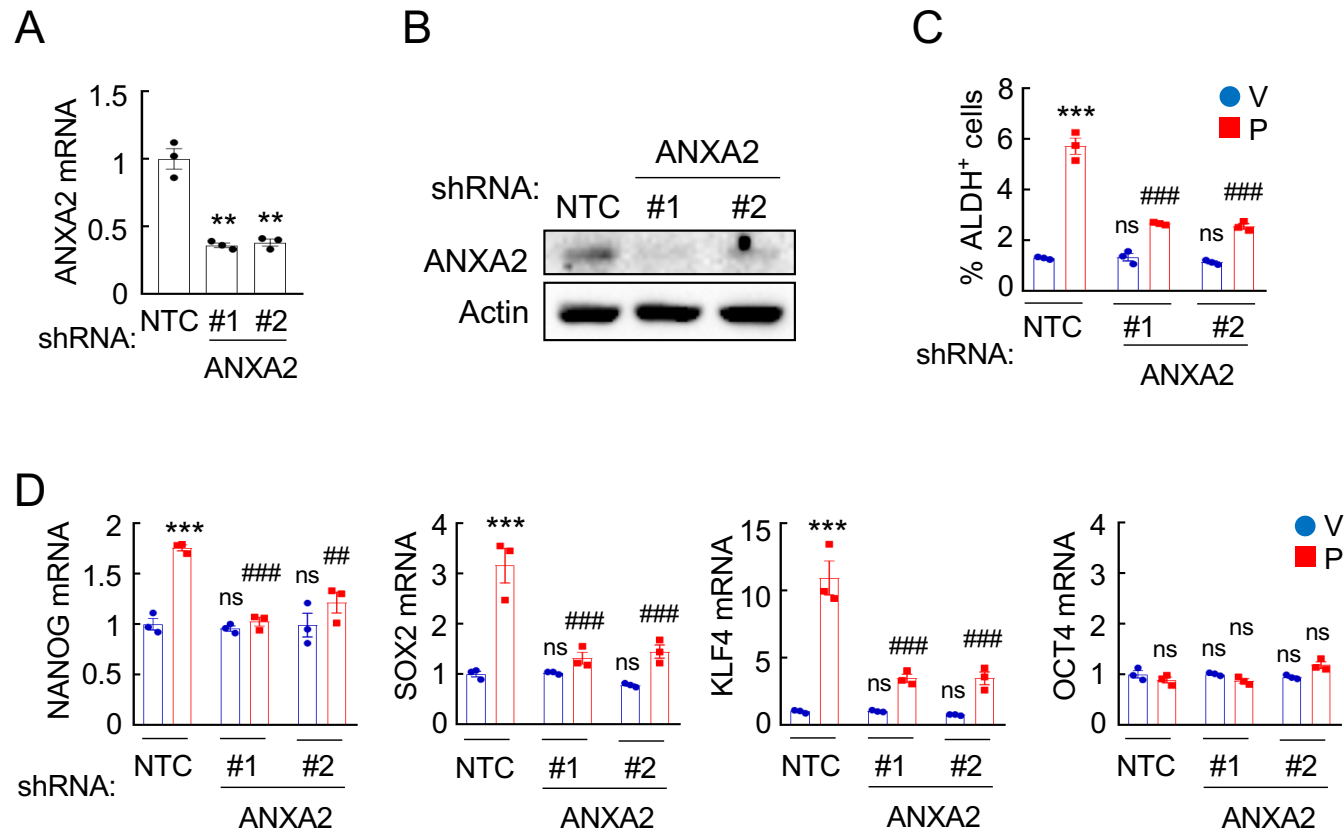

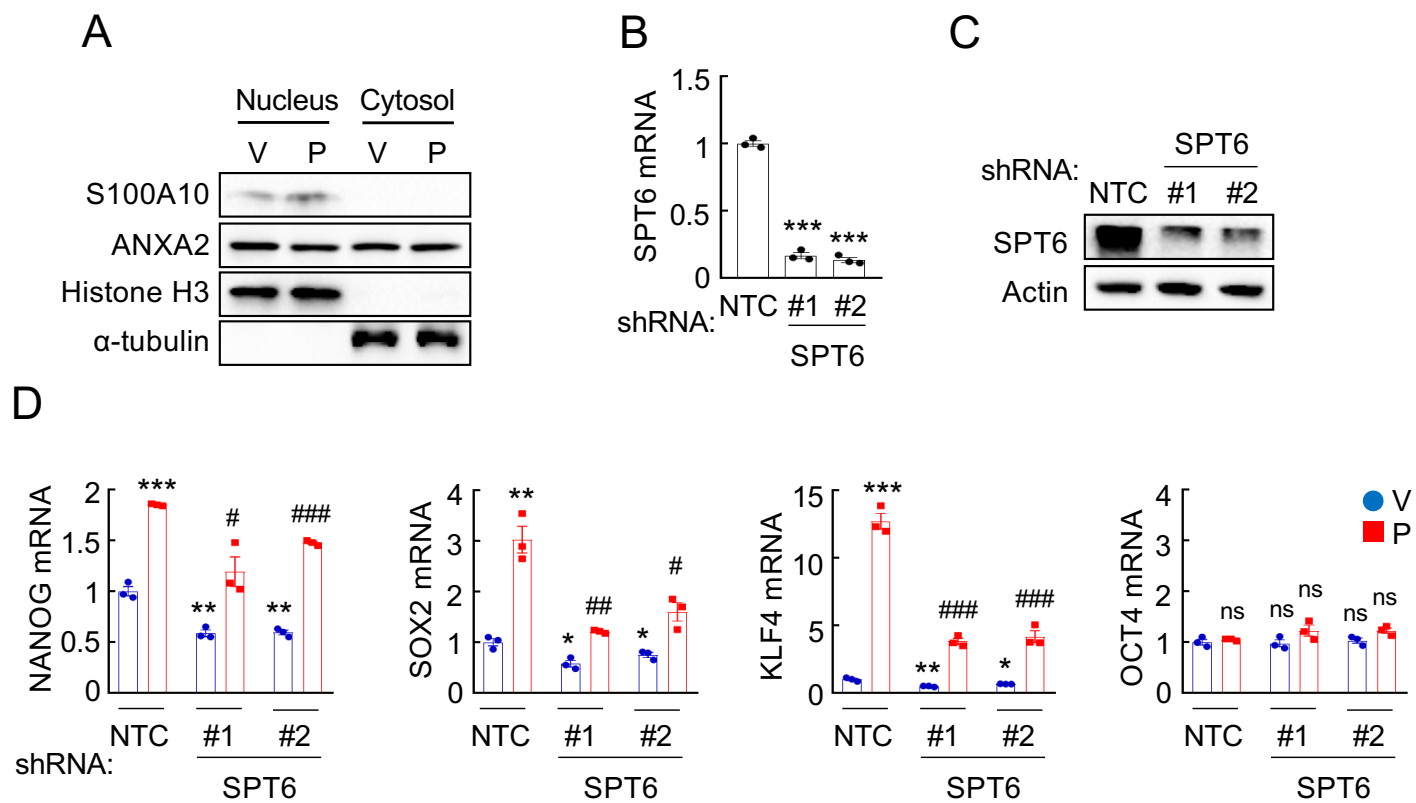

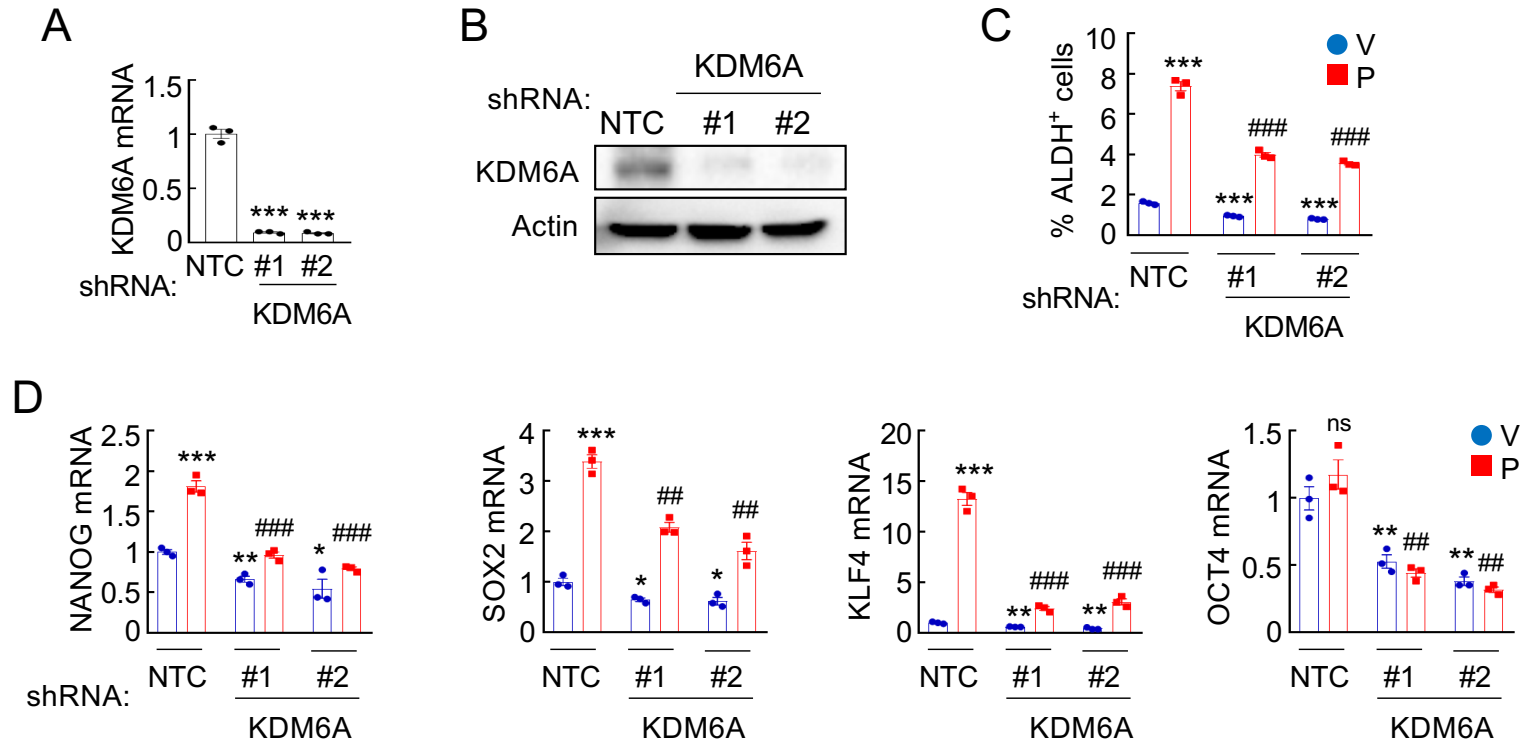

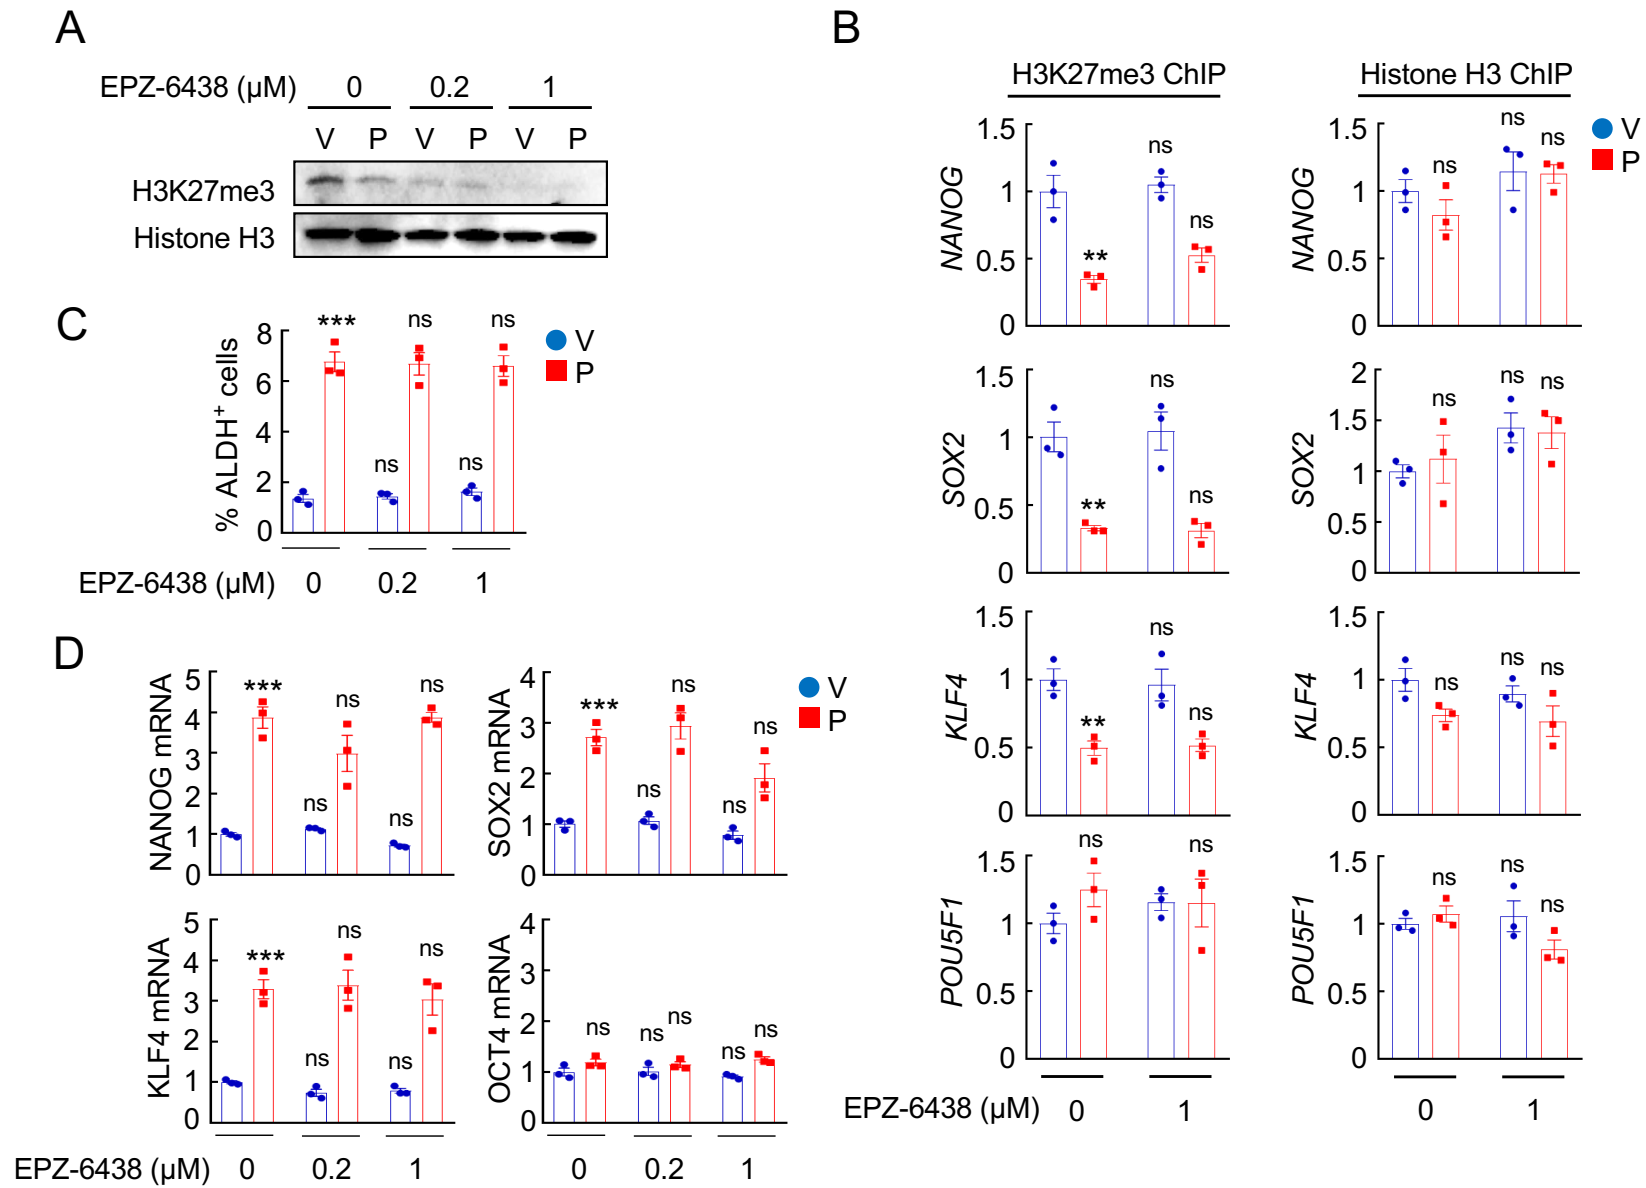

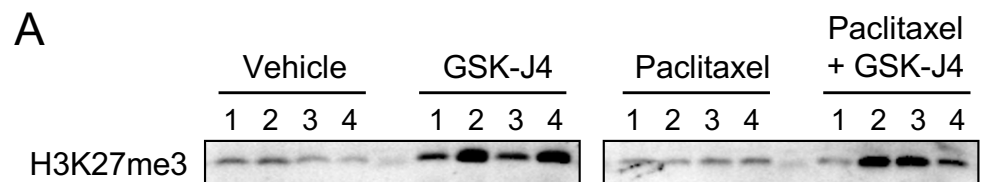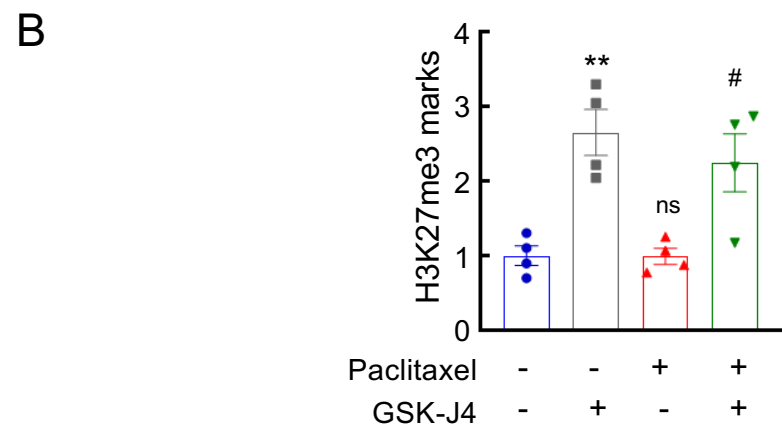

Supplement: jci-130-138577-s070.pdf [file jci-130-138577-s070.pdf]
